# Supplementary material for: Surface Modification of a Stable CdSeZnS/ZnS Alloy Quantum Dot for Immunoassay
Source: Hindawi journal article supplement (doi:10.1155/2020/4937049), 2020-10-16
Supplement: f1 [file 4937049.f1.docx]

**Supplementary Materials**

**Surface Modification of a Stable CdSeZnS/ZnS Alloy Quantum Dot for Immunoassay**

Jaehyun An,1**+** Kim-Hung Huynh,1**+** Yuna Ha,1 Heung Su Jung,2 Hyung-Mo Kim,1 Dong-Min Kim,1 Jaehi Kim, 1 Xuan-Hung Pham,1 Dong-Eun Kim,1 Jin-Nyoung Ho,3 Sangchul Lee,3 Ho-Young Lee,4 Dae Hong Jeong5 and Bong-Hyun Jun1*****

1 Department of Bioscience and Biotechnology, Konkuk University, Seoul, 143-701, Korea

2 Company ofGLOBAL ZEUS, Osan, Gyeonggi-do, 18364, Korea

3 Department of Urology, Seoul National University Bundang Hospital, Seoul, 13620, Korea

4 Department of Nuclear Medicine, Seoul National University Bundang Hospital, Seoul, 13620, Korea

5 Department of Chemistry Education, Seoul National University, Seoul, 151-019, Korea

Correspondence should be addressed to Bong-Hyun Jun; bjun@konkuk.ac.kr

**
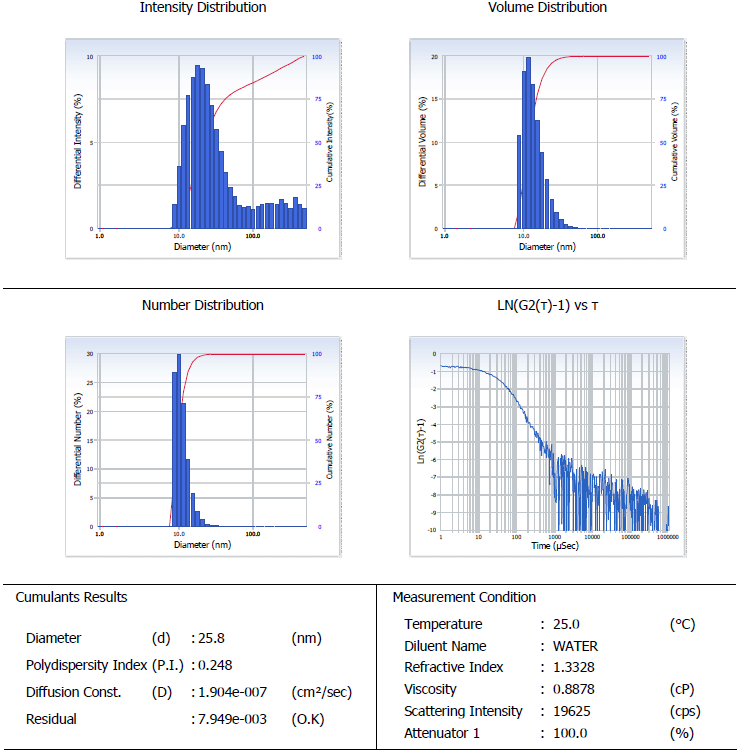
** Figure S1. It shows the DLS analysis result of alloy QD. For the alloy QDs the size of the particles in the water solvent was measured at 25.8 nm. On average, the size of the original alloy QDs are 10.1 ± 2.1 nm. Based on the above results, alloy QDs have confirmed that no aggregation occurs in the aqueous media and alloy QDs have sufficient biocompatibility.

**
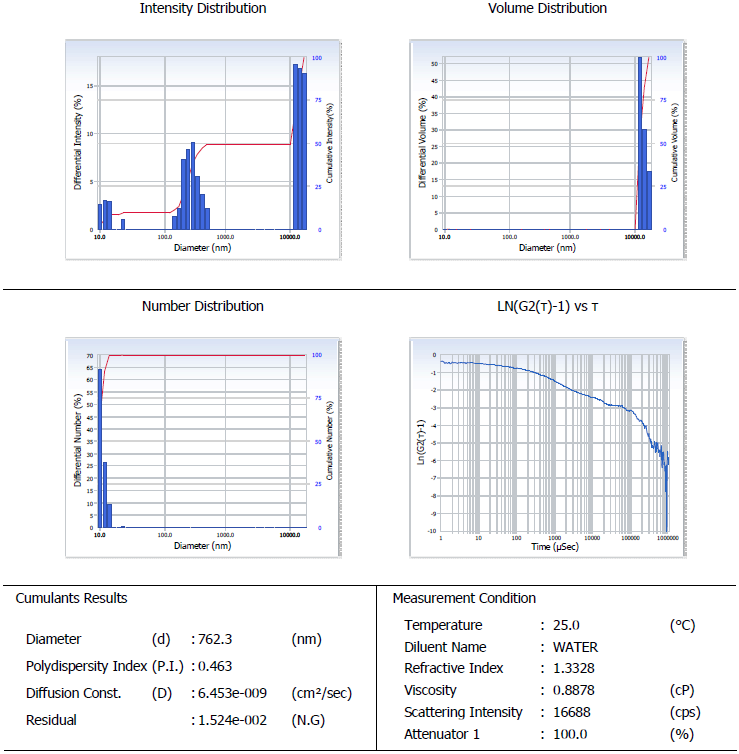
** Figure S2. It shows the DLS analysis result of commercial QDs. For the commercial QDs, the size of the particles in the water solvent was measured at 762.3 nm. On average, the size of the original commercial QDs are 5.6 ± 1.0 nm. Based on the above results, commercial QDs have confirmed that aggregation occurs in the water solvent and commercial QDs have no biocompatibility comparing with alloy QDs.

.


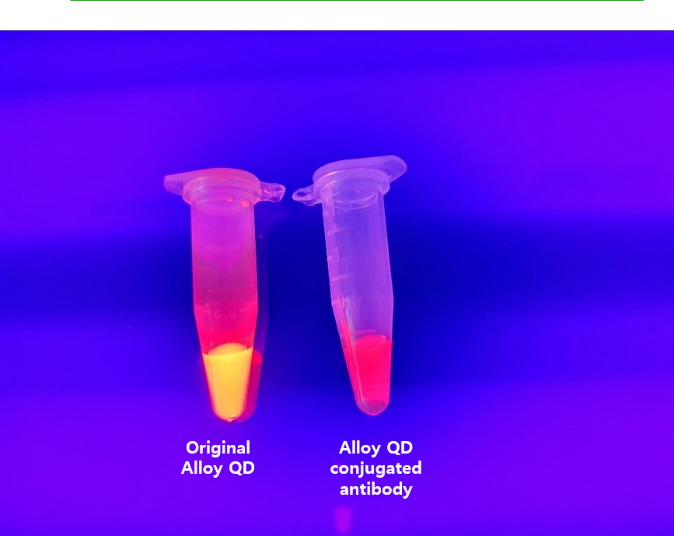

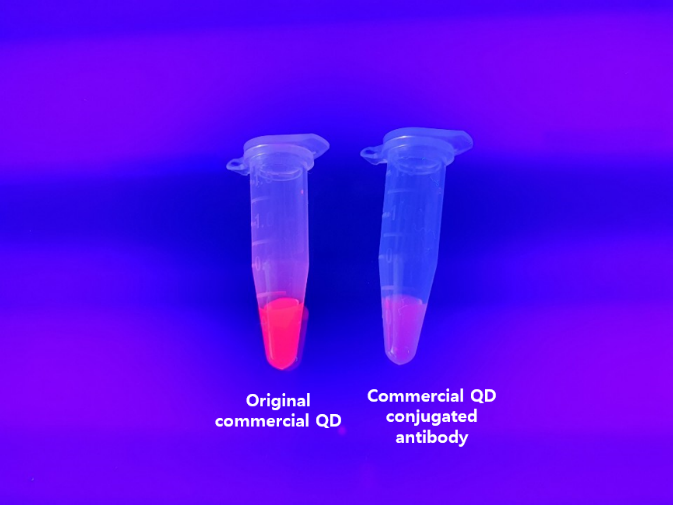


Figure S3. We checked the digital image of each QDs. Prior to the conjugation of antibodies, the original alloy QDs had the strongest fluorescence intensity in the image. After conjugating antibodies, the fluorescence of alloy QDs were slightly reduced but sufficiently bright. Commercial QDs had a strong fluorescence intensity before the conjugation of antibodies but it showed sharp fluorescence reduction after the conjugation of antibodies.


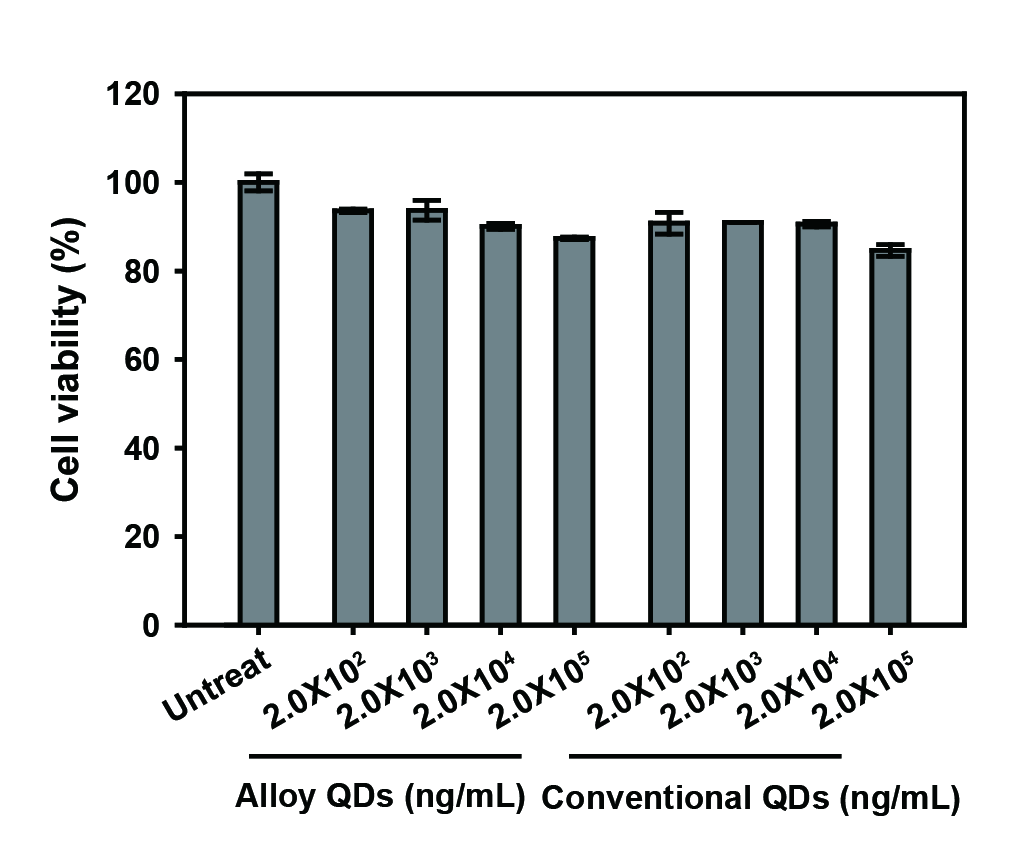
Figure S4. Cell viability assay to assess cytotoxicity of alloy QDs. Human retinal pigment epithelial ARPE-19 cells were treated with various concentrations of alloy QDs or conventional QDs. The cell viability was measured using the crystal violet after the cells were treated with alloy QDs or conventional QDs for 24 h. The data are presented as the mean ± standard deviation with three replications.

Figure S5. We used 3 S/N criteria to calculate LOD. First, we drew a fitting curve and calculated Limit of Detection based on signal to noise (S/N). The R2 value of the fitting curve was 0.97412. In practice. We assumed that S/N = Error of zero concentration of target * 3. Second, we found the equation that be fitted to our data. The equation was y = 48.2677 log[C] - 88.22194. We called the signal of LOD to be [C]. Third, y was 10.377166. (y = the signal of zero concentration of target + S/N). Therefore, log[C] LOD = (y + 88.22194) / 48.2677. Finally, the LOD was 1.1 × 102 ng/mL we modified the expression as shown in below.
